1 **Greater range filling can explain why evolutionarily older and slower diversifying**  
2 **plants are less threatened by extinction**

3 Andrew J. Tanentzap<sup>\*1</sup>, Javier Igea<sup>1</sup>, Matthew G. Johnston<sup>1</sup>, Matthew J. Larcombe<sup>2</sup>

4 <sup>1</sup>Ecosystems and Global Change Group, Department of Plant Sciences, University of  
5 Cambridge, Downing Street, Cambridge, CB2 3EA, UK

6 <sup>2</sup>Department of Botany, University of Otago, Dunedin, 9054, New Zealand

7 \*Correspondence: [ajt65@cam.ac.uk](mailto:ajt65@cam.ac.uk)

8 **Abstract**

9 Extinction threatens many species, yet few factors predict this risk across the plant Tree of  
10 Life (ToL). Taxon age is one factor that may associate with extinction if occupancy of  
11 geographic and adaptive zones varies with time. Age-dependent occupancy can also  
12 influence diversification rates and thus extinction risk where new taxa have small range and  
13 population sizes. Here we found that faster diversifying plant genera had more species  
14 threatened by extinction across the ToL. Evolutionary age had no effect in 297 sampled  
15 genera, potentially because they were older, on average, than expected. Repeating our  
16 analyses in two large, well-sampled groups, we found that extinction risk decreased with  
17 evolutionary age in conifer species but not palms. Range filling increased in older, non-  
18 threatened conifers more strongly than in threatened taxa. Our results suggest contrasting  
19 modes of speciation may explain differing patterns of extinction risk across the ToL with  
20 consequences for biodiversity conservation.

21 **Keywords:** conservation, environmental change, macroecology, macroevolution,  
22 phylogenetics

23 **Article type:** Note **Number of words in the text:** 2988

## 24 **Introduction**

25 Much of the world's biodiversity is threatened by extinction because of small geographic  
26 ranges and/or population sizes (Pimm et al. 2014). In addition to having traits that promote  
27 small ranges and population sizes independent of phylogeny, such as those associated with  
28 life history and resource use, some species may be more threatened by extinction because of  
29 their evolutionary history (Bennett and Owens 1997; Purvis et al. 2000; Johnson et al. 2002;  
30 Arregoitia et al. 2013). Extinction is consequently non-randomly distributed across the Tree  
31 of Life (ToL), evidence that chance events and human activities are not fully responsible for  
32 explaining species losses (Bennett and Owens 1997; Purvis et al. 2000; Vamosi and Wilson  
33 2008). Identifying macro-evolutionary predictors of extinction risk can therefore help to  
34 assess future conservation status where range and population data are lacking and identify  
35 reasons for its non-randomness across the ToL (Jetz and Freckleton 2015).

36 Taxon age is one measure of the amount of environmental and evolutionary change  
37 that species have experienced and may be associated with extinction risk for at least two  
38 reasons. The first relates to the idea that older taxa should be less at risk of extinction  
39 because they have had more time to disperse across a greater range (Paul et al. 2009; Ceolin  
40 and Giehl 2017), consistent with the age-and-area hypothesis (Willis 1926). Taxa that span a  
41 greater area will also tend to occupy more environments (Slatyer et al. 2013). Occupancy of  
42 more environmental space by older taxa (i.e. greater niche filling) can consequently limit  
43 younger taxa from establishment opportunities through competition (Žliobaitė et al. 2017).  
44 However, evidence of a correlation between age and range filling has been limited (Schurr et  
45 al. 2007; Paul et al. 2009; but see Weber et al. 2014), and can alternatively be detected by  
46 measuring rates of species diversification, which slow with clade age as niches are filled  
47 (Tanentzap et al. 2015). As new taxa initially tend to have small range and population sizes,  
48 especially if speciation started from small reproductively isolated populations that occupy

49 narrow adaptive spaces (Valente et al. 2010; Castiglione et al. 2017), younger species in  
50 rapidly diversifying clades should face a greater risk of extinction (Davies et al. 2011;  
51 Greenberg & Mooers 2017).

52 A second historical explanation for variation in extinction risk relates to the  
53 environment in which the geographic and adaptive ranges of species evolved. This idea can  
54 result in two contrasting patterns that we group under the “evolutionary (mis)matching  
55 hypothesis”. Older species can be more threatened by extinction because traits that were  
56 once advantageous became less adaptive as environments diverged from past selection  
57 regimes, i.e. “mismatched” (Wilson 1959; Žliobaitė et al. 2017). A classic example is the  
58 loss of large-bodied Eurasian mammals, such as woolly rhinoceros (*Coelodonta antiquitatis*),  
59 at the end of the most recent glacial period. Woolly rhinoceros were presumably maladapted  
60 for changes to their steppe habitat arising from warmer temperatures. Their potential range  
61 size (i.e. total area of suitable steppe) consequently contracted, hastening extinction  
62 (Lorenzen et al. 2011). Population densities could have remained unchanged in areas that  
63 stayed climatically favourable, resulting in the same proportion of habitat occupancy and no  
64 association between range filling and taxon age. In contrast to mismatching, older species  
65 that survive long-term environmental changes may be less at risk of extinction because they  
66 tolerate broader conditions and are ecologically more generalist (Gaston and Blackburn 1997;  
67 Liow 2007). Species should be better “matched” to the environment in these cases and have  
68 larger ranges with increasing taxon age because more sites will be favourable for dispersal  
69 and colonisation. Again, range filling can be decoupled from range size (Gaston 1994;  
70 Johnson 1998), such as if biotic interactions constrain eventual establishment. Thus, the  
71 strength of the association between taxon age and both range size and filling can help identify  
72 mechanisms that influence extinction risk.

73 Evidence that taxon age is associated with extinction varies among lineages, so testing  
74 correlations in relation to range size and occupancy can help explain this variation and make  
75 generalisations across different divisions in the ToL. Previous work in birds (Gaston and  
76 Blackburn 1997) and marsupials (Johnson et al. 2002) found that older lineages were more  
77 threatened by extinction, whilst the reverse was shown across non-lemur primates (Arregoitia  
78 et al. 2013). The only study on plants, to our knowledge, found a higher extinction risk in  
79 younger, rapidly diversifying clades of the South African Cape (Davies et al. 2011). Broader  
80 generalisations across plants have not been possible until now because of poor taxonomic  
81 sampling that prevents reliable divergence times from being estimated.

82 Here, we tested whether younger and faster-evolving lineages were associated with  
83 greater extinction risk across 297 genera. We did so by combining the largest time-calibrated  
84 phylogenetic tree presently estimated for vascular plants with all available peer-reviewed  
85 assessments of conservation status from the International Union for Conservation of Nature  
86 (IUCN) *Red List* (2016). We complemented our findings with analyses for two large,  
87 ancient, and widespread plant clades (conifers and palms). We collated data on range size  
88 and range filling for these two groups to test the age-and-area and (mis)matching hypotheses,  
89 and how they might explain differences in age-extinction correlations between taxonomic  
90 groups with contrasting histories. Positive age-extinction correlations would implicate the  
91 mismatching hypothesis, while negative correlations would implicate matching or the age-  
92 and-area hypothesis, depending on the strength of underlying associations with range size and  
93 filling. These analyses also allowed us to address concerns around estimating divergence  
94 times and threat status from the larger but under-sampled phylogenetic tree.

95

## 96 **Methods**

### 97 *Data assembly*

98 We first selected genera for which we could confidently estimate the time of divergence from  
99 their sister genera (i.e. ‘stem age’). Genera were selected from the time-calibrated, species-  
100 level phylogenetic tree of Qian and Jin (2016), which was an updated version of Zanne et al.  
101 (2014). The selected genera came from densely sampled clades (i.e. families) to circumvent  
102 low sampling across the broader tree both at a species- and genus-level. For each family, we  
103 calculated the proportion of genera that were sampled in the phylogeny from the taxonomic  
104 database curated by the *taxonlookup* v1.1.1 package in R v3.2 and retained those with  $\geq 60\%$   
105 coverage. We also used stem ages because they only require one species to be sampled  
106 within each genus and reflect the entire evolutionary history of clades unlike crown ages that  
107 can have young age biases because they consider only extant species (Scholl and Wiens  
108 2016). Taxa outside of an established “core clade” for each genus, as determined using  
109 *MonoPhy* in R, were removed prior to all calculations. After calculating ages from the large  
110 tree, we intersected the selected genera with 20,473 IUCN assessments (IUCN 2016) and  
111 calculated the proportion of species in each genus threatened with extinction. We further  
112 restricted our analysis to genera with  $>1$  species, of which  $\geq 20\%$  had sufficient data to be  
113 assessed for extinction risk. Overall,  $n = 297$  genera had both reliable age and risk status data  
114 spanning 2,679 IUCN species-level assessments.

115 We also estimated net diversification rates for each of our selected genera. We used a  
116 well-established method-of-moments estimator that assumed diversification rates were  
117 constant over time within genera given a known stem age and species richness (Magallon and  
118 Sanderson 2001). Following standard practice, we assumed three values of relative  
119 extinction  $\varepsilon$  of 0, 0.5 and 0.9 when estimating diversification (Magallon and Sanderson  
120 2001). Taxonomy was standardised to The Plant List nomenclature using the *Taxonstand* R  
121 package prior to processing all datasets.

122 We also repeated our diversification analysis as above with two large clades that were  
123 well sampled at a species-level in separate time-calibrated phylogenies. These clades  
124 included 70% of all 651 accepted Pinales (extant conifers) (Leslie et al. 2012) and all 2,539  
125 Arecaceae (palms) (Faurby et al. 2016). We intersected risk statuses of the two clades with  
126 species stem ages, giving  $n = 340$  and  $346$ , respectively. For the palms, we used the  
127 maximum clade credibility tree that we computed from the posterior distribution of trees that  
128 was generated using topological constraints based on Govaerts taxonomy recommended in  
129 Faurby et al. (2016).

130 Finally, we assembled range data for our two large clades. Georeferenced records  
131 with no flagged issues were downloaded from the Global Biodiversity Information Facility  
132 ([www.gbif.org](http://www.gbif.org)) using the R package *rgif*. Conifer data were supplemented by published  
133 records absent from GBIF (table A1 available online). All duplicate and spatially invalid  
134 records (e.g. non-numerical, exceeding global extent, located in the ocean, urban areas, or  
135 country centroids) were removed with the R package *sampbias*. Using the occurrences, we  
136 estimated the actual range size as the total number of 0.25 decimal degree grid cells occupied  
137 by each species (after Grossenbacher et al. 2015). To estimate potential range size, we  
138 employed a mechanistic species distribution model (SDM) that predicts the physiological  
139 tolerances of species for growth from distribution data (Higgins et al. 2012). Absence points  
140 for the SDM were generated using standard approaches (full details given in Appendix A).  
141 We then summed the total number of 0.25 decimal degree grid cells potentially occupied by  
142 each species and calculated range filling as the ratio of the actual to potential range size.

143

144 *Statistical analyses*

145 We separately tested whether genera with a greater proportion of threatened taxa were  
146 correlated with younger ages and faster diversification rates using phylogenetic least squares  
147 (PGLS). We fitted the PGLS using the *gls* function in R to account for different sample sizes  
148 within each genus by weighting observations with the inverse square-root of the number of  
149 IUCN assessments that they received (Garamszegi and Møller 2010). Following standard  
150 practice, the PGLS was fitted with maximum-likelihood transformations of branch lengths  
151 based on the strength of phylogenetic covariance estimated by Pagel's  $\lambda$  (Orme 2013). Both  
152 ages and diversification rates were log-transformed. Models were not fitted with both  
153 predictors simultaneously as they were highly correlated (Spearman's  $r < -0.79$ ). We  
154 repeated this analysis in conifers and palms, and again did not simultaneously fit age and  
155 diversification rates given high correlations ( $r < -0.71$  when  $\varepsilon = 0.0$  or  $0.5$ ). Fit of the PGLS  
156 was summarised by the correlation coefficient  $r$  between predicted and observed values.

157 For conifers and palms, we also tested whether extinction risk was associated with  
158 younger species and how this was influenced by range dynamics. We first fitted logistic  
159 regression models to threat status as a function of species age using penalised maximum-  
160 likelihood and accounted for phylogenetic non-independence of species with the *phylolm* R  
161 package. Predictors were scaled to a mean of 0 and standard deviation of 1 to compare  
162 effects. We then tested how range size and filling were associated with species age. To  
163 reduce potential biases in divergence time estimates that can confound associations with  
164 range size (Hodge and Bellwood 2015), we focused our analysis on pairs of sister species  
165 with contrasting risk status (i.e. non-threatened and threatened species of the same age). For  
166 each sister pair, we calculated the difference in range filling and size. We expected  
167 threatened species would, by definition, always have relatively small ranges, producing an  
168 invariant or weak age-range association. By contrast, non-threatened species should reach  
169 larger and/or more filled ranges with age if the age-and-area or matching hypotheses were

170 supported, resulting in greater disparity between the two threat categories over time (i.e.  
171 positive correlation). We tested if this correlation was different than expected by chance by  
172 comparing it to the correlation calculated from randomly sampling the same number of sister  
173 pairs 1,000 times, but choosing those where both members of the pair were non-threatened;  
174 both members were threatened for palms as most pairs fell in this category. We also checked  
175 signs of range-age correlations for each threat category individually using PGLS to verify  
176 whether statistically significant correlations in our sister analysis arose from ranges  
177 increasing or decreasing more slowly with age in one group as opposed to another.

178

## 179 **Results**

180 We found that relatively more species were threatened with extinction in faster diversifying  
181 genera (for  $\varepsilon$  of 0.0, 0.5, 0.9:  $t_{295} = 2.13, 2.18, 2.24$  and  $p = 0.034, 0.030, 0.026$ , respectively;  
182  $r = 0.15$  for all). The mean proportion of a genus threatened with extinction doubled from  
183 36% to 71% between the slowest and fastest diversifying genera (fig. 1). These results did  
184 not arise because faster diversifying genera were younger, as genus age had no effect on risk  
185 status ( $t_{295} = -1.66, p = 0.099, r = 0.13$ ), but we did find an age bias in our dataset. Sampled  
186 genera were older and more diverse on average than obtained by applying our sampling  
187 criteria to the initial tree (i.e. before intersecting with threat status; table B1), which may  
188 explain why we failed to detect an association between younger genera and extinction risk.  
189 Diversification was also slower in our sample, but the sampling criteria did not lead to  
190 differences in risk status (table B1). Repeating our analyses with only the genera from the  
191 more complete species-level datasets was inconclusive, likely because of small sample sizes  
192 ( $n \leq 36$ ; table B2).



193 Analyses with the more complete species-level datasets also revealed that younger  
194 conifers but not palms were relatively more threatened by extinction ( $z_{344} = -2.67, p = 0.008$   
195 and  $z_{338} = -1.46, p = 0.145$ , respectively; fig. 2a). The mean effect  $\pm$  SE was more than twice  
196 as large in the conifers ( $-0.36 \pm 0.14$  vs  $-0.15 \pm 0.10$  on log-scale), leading to nearly a 50%  
197 absolute reduction in the probability of being threatened over the range of observed ages (fig.  
198 2b).

199 Greater range filling reduced extinction risk of older taxa, supporting the age-and-area  
200 hypothesis. Range filling increased with taxon age in non-threatened conifers (i.e. positive  
201 slope) more strongly than in threatened taxa, resulting in a greater difference than expected if  
202 sisters had the same threat status ( $r = 0.15, p = 0.004$ ; fig. 3a). By contrast, range size  
203 differences did not vary over time ( $r = -0.16, p = 0.567$ ; fig. 3b). Contrasting threat status did  
204 not alter correlations between age and either range size or filling in palms, consistent with the  
205 lack of an age-extinction association ( $r = 0.04, p = 0.379$  and  $r = -0.13, p = 0.868$ ,  
206 respectively).

207

## 208 **Discussion**

209 Lineages that occupy less of their potential range face a greater risk of extinction (IUCN  
210 2016), and our results suggest that this may depend on taxon age in at least two ways that are  
211 consistent with the age-and-area hypothesis. First, young species tend to occupy narrower  
212 geographic and adaptive spaces (Castiglione et al. 2017), particularly as most plant speciation  
213 involves vicariance (Davies et al. 2011; Anacker and Strauss 2014; Igea et al. 2015). Time  
214 may consequently be required for post-speciation range expansions despite much of the  
215 available area remaining favourable for establishment (Pigot et al. 2010; Pigot and Tobias  
216 2013; Anacker and Strauss 2014). Second, if species diversification is density-dependent,

217 such as because of limited resources, then younger lineages that fill less of their range will  
218 tend to produce relatively more young species (Rabosky and Hurlbert 2015). Faster rates of  
219 species diversification will again elevate extinction risk in younger lineages if reproductive  
220 isolation arises within small geographic and adaptive spaces. By contrast, time-dependent  
221 range expansions may be unnecessary under other modes of speciation, e.g. parapatry or  
222 sympatry (Pigot et al. 2010), and if range expansion is not limited post-speciation (Schurr et  
223 al. 2007). These contrasting dynamics of different speciation modes can also help explain the  
224 lack of consistent evidence for age-dependent extinction across the large taxonomic scale in  
225 our study and across animals (Gaston and Blackburn 1997; Johnson et al. 2002; Davies et al.  
226 2011; Arregoitia et al. 2013; Greenberg and Mooers 2017)

227 Palms and conifers have different biogeographic histories that can explain the  
228 contrasting results between the groups. Conifer diversification is presumed to have depended  
229 on range contraction and expansion (Leslie et al. 2012; Condamine et al. 2017), whereas  
230 palms may have formed new species by dispersing into new habitats that were subject to  
231 divergent adaptation rather than vicariance (Savolainen et al. 2006; Roncal et al. 2015).  
232 Thus, older conifers may have had more time to fill their ranges and reduce their extinction  
233 risk. The predominance of conifers in topographically complex regions, especially in the  
234 Northern Hemisphere, further supports the importance of time-dependent range shifts in  
235 fostering diversity (Leslie et al. 2012). Palms are also restricted to the more ecologically  
236 stable tropics, where range dynamics may vary less over time (Couvreur et al. 2011), though  
237 such stability may equally help explain the resilience to extinction of older conifers in the  
238 Southern Hemisphere (Leslie et al. 2012; Jordan et al. 2016). Finally, we cannot exclude the  
239 possibility that palm species that were susceptible to environmental change have already gone  
240 extinct or traits that make species more prone to extinction are not taxonomically conserved,  
241 resulting in no signature of taxon age on extinction (Arregoitia et al. 2013). Our results with

242 conifers and palms were also not simply an artefact of biased sampling as ages and rates did  
243 not markedly differ from observations across entire clades, i.e. before filtering with IUCN  
244 data (table B3). Similar results to the larger phylogeny further suggest that our conclusions  
245 were robust to biases in IUCN assessments (Webb and Mindel 2015).

246 Our results suggest that macro-evolutionary dynamics have some value for  
247 biodiversity conservation. Specifically, we found that these dynamics provided an indicator  
248 of contemporary extinction risk that might be easier to derive for large numbers of taxa than  
249 detailed species-level assessments. Macro-evolutionary dynamics might also offer insight  
250 into the vulnerability of species to future change, as the smaller population and range sizes  
251 that make some species prone to extinction are likely to be carried into the future (Condamine  
252 et al. 2013). Although our results must be interpreted with caution, given biases inherent to  
253 our datasets, they provide new evidence that lineages span a continuum from little species  
254 turnover to producing fast diversifying and extinction-prone taxa (Greenberg and Mooers  
255 2017). The consistent effect of age that we found at different taxonomic scales also suggests  
256 similar patterns should emerge when the plant Tree of Life becomes more densely sampled.

257

#### 258 **Data Accessibility**

259 Data will be deposited in the Dryad repository upon acceptance.

260

#### 261 **Acknowledgements**

262 We thank Guy Tanentzapf for the question that inspired this study and Greg Jordan for  
263 sharing the conifer phylogeny.

264

#### 265 **Literature Cited**

- 266 Anacker, B. L., and S. Y. Strauss. 2014. The geography and ecology of plant speciation:  
267 range overlap and niche divergence in sister species. *Proceedings of the Royal Society*  
268 B 281:20132980.
- 269 Arregoitia, L. D. V., S. P. Blomberg, and D. O. Fisher. 2013. Phylogenetic correlates of  
270 extinction risk in mammals: species in older lineages are not at greater risk.  
271 *Proceedings of the Royal Society B* 280:20131092.
- 272 Bennett, P. M., and I. P. F. Owens. 1997. Variation in extinction risk among birds: chance or  
273 evolutionary predisposition? *Proceedings of the Royal Society B* 264:401–408.
- 274 Castiglione, S., A. Mondanaro, M. Melchionna, C. Serio, M. Di Febbraro, F. Carotenuto, and  
275 P. Raia. 2017. Diversification rates and the evolution of species range size frequency  
276 distribution. *Frontiers in Ecology and Evolution* 5:147.
- 277 Ceolin, G. B., and E. L. H. Giehl. 2017. A little bit everyday: range size determinants in  
278 *Arachis* (Fabaceae), a dispersal-limited group. *Journal of Biogeography* 44:2798–  
279 2807.
- 280 Condamine, F. L., A. B. Leslie, and A. Antonelli. 2017. Ancient islands acted as refugia and  
281 pumps for conifer diversity. *Cladistics* 33:69–92.
- 282 Couvreur, T. L., F. Forest, and W. J. Baker. 2011. Origin and global diversification patterns  
283 of tropical rain forests: inferences from a complete genus-level phylogeny of palms.  
284 *BMC Biology* 9:44.
- 285 Davies, T. J., G. F. Smith, D. U. Bellstedt, J. S. Boatwright, B. Bytebier, R. M. Cowling, F.  
286 Forest, et al. 2011. Extinction risk and diversification are linked in a plant biodiversity  
287 hotspot. *PLOS Biology* 9:e1000620.
- 288 Faurby, S., W. L. Eiserhardt, W. J. Baker, and J.-C. Svenning. 2016. An all-evidence species-  
289 level supertree for the palms (Arecaceae). *Molecular Phylogenetics and Evolution*  
290 100:57–69.

- 291 Garamszegi, L. Z., and A. P. Møller. 2010. Effects of sample size and intraspecific variation  
292 in phylogenetic comparative studies: a meta-analytic review. *Biological Reviews*  
293 85:797–805.
- 294 Gaston, K. J. 1994. Measuring geographic range sizes. *Ecography* 17:198–205.
- 295 Gaston, K. J., and T. M. Blackburn. 1997. Evolutionary age and risk of extinction in the  
296 global avifauna. *Evolutionary Ecology* 11:557–565.
- 297 Greenberg, D. A., and A. Ø. Mooers. 2017. Linking speciation to extinction: Diversification  
298 raises contemporary extinction risk in amphibians. *Evolution Letters* 1:40–48.
- 299 Grossenbacher, D., R. Briscoe Runquist, E. E. Goldberg, and Y. Brandvain. 2015.  
300 Geographic range size is predicted by plant mating system. *Ecology Letters* 18:706–  
301 713.
- 302 Higgins, S. I., R. B. O’Hara, O. Bykova, M. D. Cramer, I. Chuine, E.-M. Gerstner, T.  
303 Hickler, et al. 2012. A physiological analogy of the niche for projecting the potential  
304 distribution of plants. *Journal of Biogeography* 39:2132–2145.
- 305 Hodge, J., and D. R. Bellwood. 2015. On the relationship between species age and  
306 geographical range in reef fishes: are widespread species older than they seem?  
307 *Global Ecology and Biogeography* 24:495–505.
- 308 Igea, J., D. Bogarín, A. S. T. Papadopulos, and V. Savolainen. 2015. A comparative analysis  
309 of island floras challenges taxonomy-based biogeographical models of speciation.  
310 *Evolution* 69:482–491.
- 311 International Union for Conservation of Nature [IUCN]. 2016. The IUCN Red List of  
312 Threatened Species. Available at: <http://www.iucnredlist.org>
- 313 Jetz, W., and R. P. Freckleton. 2015. Towards a general framework for predicting threat  
314 status of data-deficient species from phylogenetic, spatial and environmental  
315 information. *Philosophical Transactions of the Royal Society B* 370:20140016.

- 316 Johnson, C. N. 1998. Species extinction and the relationship between distribution and  
317 abundance. *Nature* 394:272.
- 318 Johnson, C. N., S. Delean, and A. Balmford. 2002. Phylogeny and the selectivity of  
319 extinction in Australian marsupials. *Animal Conservation* 5:135–142.
- 320 Jordan, G. J., P. A. Harrison, J. R. P. Worth, G. J. Williamson, and J. B. Kirkpatrick. 2016.  
321 Palaeoendemic plants provide evidence for persistence of open, well-watered  
322 vegetation since the Cretaceous. *Global Ecology and Biogeography* 25:127–140.
- 323 Leslie, A. B., J. M. Beaulieu, H. S. Rai, P. R. Crane, M. J. Donoghue, and S. Mathews. 2012.  
324 Hemisphere-scale differences in conifer evolutionary dynamics. *Proceedings of the*  
325 *National Academy of Sciences* 109:16217–16221.
- 326 Liow, L. H. 2007. Lineages with long durations are old and morphologically average: an  
327 analysis using multiple datasets. *Evolution* 61:885–901.
- 328 Lorenzen, E. D., D. Nogués-Bravo, L. Orlando, J. Weinstock, J. Binladen, K. A. Marske, A.  
329 Ugan, et al. 2011. Species-specific responses of Late Quaternary megafauna to  
330 climate and humans. *Nature* 479:359–364.
- 331 Magallon, S., and M. J. Sanderson. 2001. Absolute diversification rates in angiosperm clades.  
332 *Evolution* 55:1762–1780.
- 333 Orme, D. 2013. The caper Package: Comparative Analysis of Phylogenetics and Evolution in  
334 R. Available at: <https://cran.r-project.org/web/packages/caper/vignettes/caper.pdf>
- 335 Paul, J. R., C. Morton, C. M. Taylor, and S. J. Tonsor. 2009. Evolutionary time for dispersal  
336 limits the extent but not the occupancy of species' potential ranges in the tropical  
337 plant genus *Psychotria* (Rubiaceae). *American Naturalist* 173:188–199.
- 338 Pigot, A. L., A. B. Phillimore, I. P. F. Owens, and C. D. L. Orme. 2010. The shape and  
339 temporal dynamics of phylogenetic trees arising from geographic speciation.  
340 *Systematic Biology* 59:660–673.

- 341 Pigot, A. L., and J. A. Tobias. 2013. Species interactions constrain geographic range  
342 expansion over evolutionary time. *Ecology Letters* 16:330–338.
- 343 Pimm, S. L., C. N. Jenkins, R. Abell, T. M. Brooks, J. L. Gittleman, L. N. Joppa, P. H.  
344 Raven, et al. 2014. The biodiversity of species and their rates of extinction,  
345 distribution, and protection. *Science* 344:1246752.
- 346 Purvis, A., J. L. Gittleman, G. Cowlishaw, and G. M. Mace. 2000. Predicting extinction risk  
347 in declining species. *Proceedings of the Royal Society B* 267:1947–1952.
- 348 Qian, H., and Y. Jin. 2016. An updated megaphylogeny of plants, a tool for generating plant  
349 phylogenies and an analysis of phylogenetic community structure. *Journal of Plant*  
350 *Ecology* 9:233–239.
- 351 Rabosky, D. L., and A. H. Hurlbert. 2015. Species richness at continental scales is dominated  
352 by ecological limits. *American Naturalist* 185:572–583.
- 353 Roncal, J., M. Couderc, P. Baby, F. Kahn, B. Millán, A. W. Meerow, and J.-C. Pintaud. 2015.  
354 Palm diversification in two geologically contrasting regions of western Amazonia.  
355 *Journal of Biogeography* 42:1503–1513.
- 356 Savolainen, V., M.-C. Anstett, C. Lexer, I. Hutton, J. J. Clarkson, M. V. Norup, M. P. Powell,  
357 et al. 2006. Sympatric speciation in palms on an oceanic island. *Nature* 441:210.
- 358 Scholl, J. P., and J. J. Wiens. 2016. Diversification rates and species richness across the Tree  
359 of Life. *Proceedings of the Royal Society B* 283:20161334.
- 360 Slatyer, R. A., M. Hirst, and J. P. Sexton. 2013. Niche breadth predicts geographical range  
361 size: a general ecological pattern. *Ecology Letters* 16:1104–1114.
- 362 Tanentzap, A. J., A. J. Brandt, R. D. Smissen, P. B. Heenan, T. Fukami, and W. G. Lee.  
363 2015. When do plant radiations influence community assembly? The importance of  
364 historical contingency in the race for niche space. *New Phytologist* 207:468–479.

- 365 Valente, L. M., V. Savolainen, and P. Vargas. 2010. Unparalleled rates of species  
366 diversification in Europe. *Proceedings of the Royal Society B* 277:rsbp20092163.
- 367 Vamosi, J. C., and J. R. U. Wilson. 2008. Nonrandom extinction leads to elevated loss of  
368 angiosperm evolutionary history. *Ecology Letters* 11:1047–1053.
- 369 Webb, T. J., and B. L. Mindel. 2015. Global patterns of extinction risk in marine and non-  
370 marine systems. *Current biology: CB* 25:506–511.
- 371 Weber, M. de M., R. D. Stevens, M. L. Lorini, and C. E. V. Grelle. 2014. Have old species  
372 reached most environmentally suitable areas? A case study with South American  
373 phyllostomid bats. *Global Ecology and Biogeography* 23:1177–1185.
- 374 Willis, J. C. 1926. Age and area. *The Quarterly Review of Biology* 1:553–571.
- 375 Wilson, E. O. 1959. Adaptive shift and dispersal in a tropical ant fauna. *Evolution* 13:122–  
376 144.
- 377 Zanne A. E., D. C. Tank, W. K. Cornwell, J. M. Eastman, S. A. Smith, R. G. FitzJohn, D J.  
378 McGlinn, et al. 2014. Three keys to the radiation of angiosperms into freezing  
379 environments. *Nature* 506:89–92.
- 380 Žliobaitė, I., M. Fortelius, and N. C. Stenseth. 2017. Reconciling taxon senescence with the  
381 Red Queen’s hypothesis. *Nature* 552:92–95.



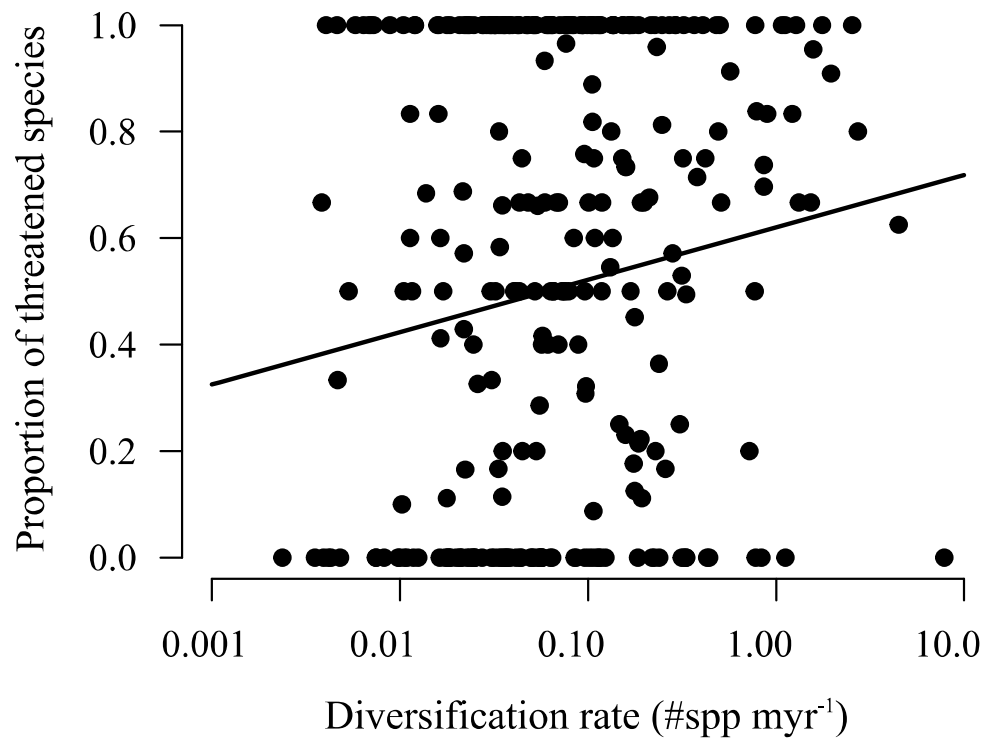

382

383 **Figure 1.** More species are threatened with extinction in faster diversifying genera. Solid

384 line is mean association estimated by PGLS for  $\varepsilon = 0.50$ .

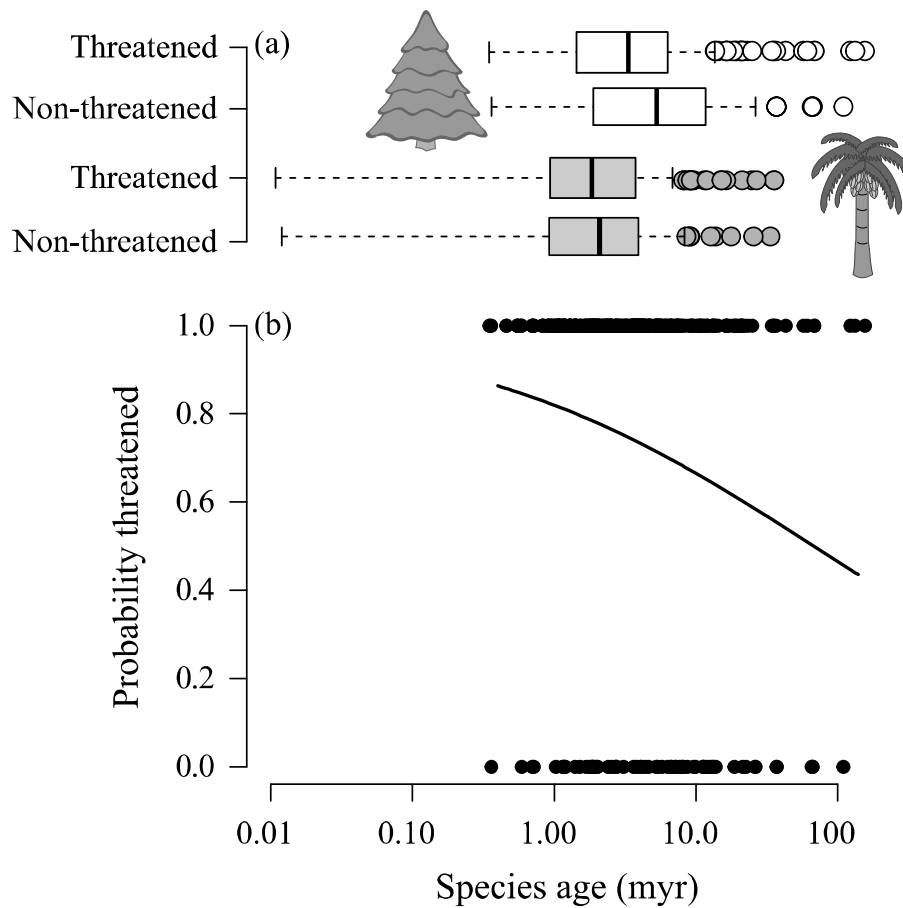

385

386 **Figure 2.** Younger conifers but not palms have a greater probability of being threatened by  
387 extinction. (a) Boxplot for stem ages of conifer (white,  $n = 346$ ) and palm (grey,  $n = 340$ )  
388 species that were classified as either threatened or non-threatened. Solid line is median, box  
389 is inter-quartile range, whiskers extend 1.5-times the interquartile range, and points are  
390 outliers. (b) Change in probability of a conifer being classified as threatened with species  
391 age. Solid line is mean association estimated by phylogenetic logistic regression.

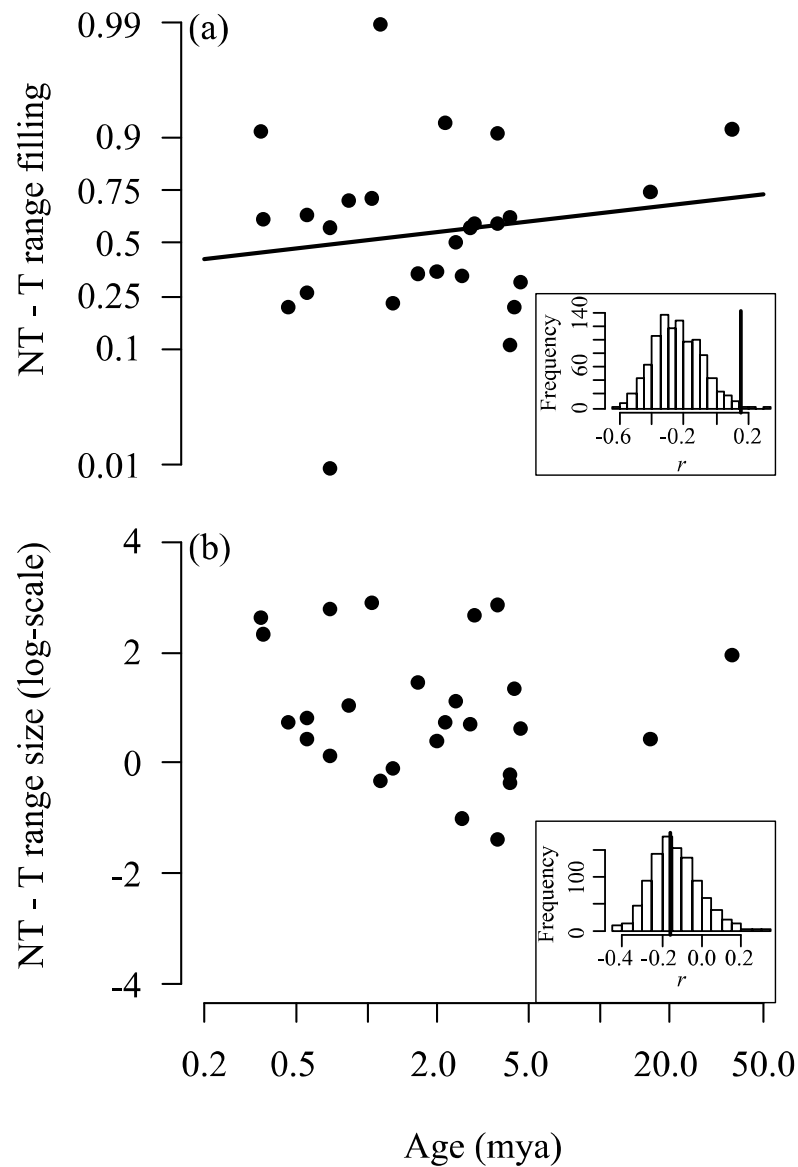

392

393 **Figure 3. Differences in range characteristics between sister conifers of contrasting**

394 **threat status changes with their age.** For each sister pair of non-threatened (NT) and

395 threatened (T) taxa we calculated the difference in the (a) proportion of their potential ranges

396 that was filled and (b) the absolute size of log-transformed ranges. Solid line is the slope for

397 the corresponding correlation coefficient  $r$ . Inset shows frequency distribution of  $r$  calculated

398 for 1,000 random simulations of sister pairs of the same threat category, with vertical line

399 denoting observed correlation for contrasting threat status (i.e. corresponding to plotted data

400 points).
